# Supplementary material
Source: Springer Nature journal article supplement (https://www.springermedizin.de/resource/supplementary/12879_2014_3135_MOESM3_ESM.docx/9446046)
Supplement: MOESM3 [file 9446046]

| Table 1. Comparison of mean monthly drug use density values expressed as DDD per 100 patient days or RDD per 100 patient days in the medical service pre- and post-intervention. | | | | | | | | | |
| --- | --- | --- | --- | --- | --- | --- | --- | --- | --- |
|  | DDD/100 | | | |  | RDD/100 | | | |
| Drug class | Pre- | Post- | Percent change | P value |  | Pre- | Post- | Percent change | P value |
| Cephalosporins | 20.1 | 14.0 | -30.2% | <0.001 |  | 16.3 | 10.3 | -36.8% | <0.001 |
| 3° Cephalosporins | 14.4 | 7.4 | -49.0% | <0.001 |  | 13.1 | 6.4 | -51.3% | <0.001 |
| 1°/2° Cephalosporins | 5.6 | 6.6 | +17.7% | <0.05 |  | 3.2 | 3.9 | +23.6% | <0.01 |
| Penicillins | 23.1 | 29.6 | +28.3% | <0.001 |  | 15.4 | 18.2 | +17.9% | <0.001 |
| Piperacillin ± BLI | 9.3 | 9.9 | +5.8% | ns |  | 10.9 | 11.5 | +5.8% | ns |
| Aminopenicillins + BLI | 6.6 | 11.3 | +69.9% | <0.001 |  | 2.4 | 4.1 | +70.4% | <0.001 |
| Narrow-spectrum penicillins | 7.1 | 8.5 | +19.1% | ns |  | 2.1 | 2.5 | +20.3% | ns |
| Carbapenems | 9.5 | 8.3 | -12.7% | <0.01 |  | 6.9 | 5.8 | -15.7% | <0.001 |
| Fluoroquinolones | 19.6 | 12.0 | -38.5% | <0.001 |  | 17.7 | 10.1 | -43.2% | <0.001 |
| Aminoglycosides | 0.9 | 0.7 | -18.9% | ns |  | 0.7 | 0.6 | -19.1% | ns |
| Glycopeptides | 4.3 | 3.9 | -8.6% | ns |  | 4.3 | 3.9 | -8.6% | ns |
| Tetracyclines | 1.4 | 0.9 | -36.9% | <0.01 |  | 1.0 | 0.7 | -35.9% | <0.01 |
| Macrolides/clindamycin | 18.1 | 13.7 | -24.4% | <0.001 |  | 10.3 | 7.9 | -22.8% | 0.001 |
|  |  |  |  |  |  |  |  |  |  |
| TOTAL | 110.5 | 94.8 | -14.2% | <0.001 |  | 86.1 | 68.9 | -19.9% | <0.001 |

Beta-lactamase inhibitor (BLI)
